# Supplementary material
Source: MDPI journal article supplement (https://www.mdpi.com/2674-1172/2/2/8)
Supplement: s1 [file s1]

Supplementary Material

**A microwell device for the efficient generation of arrays of  
microtissues and humanized bone marrow micro-ossicles**

Kathryn Futrega, Md. Shafiullah Shajib, Pamela G. Robey, and Michael R. Doran

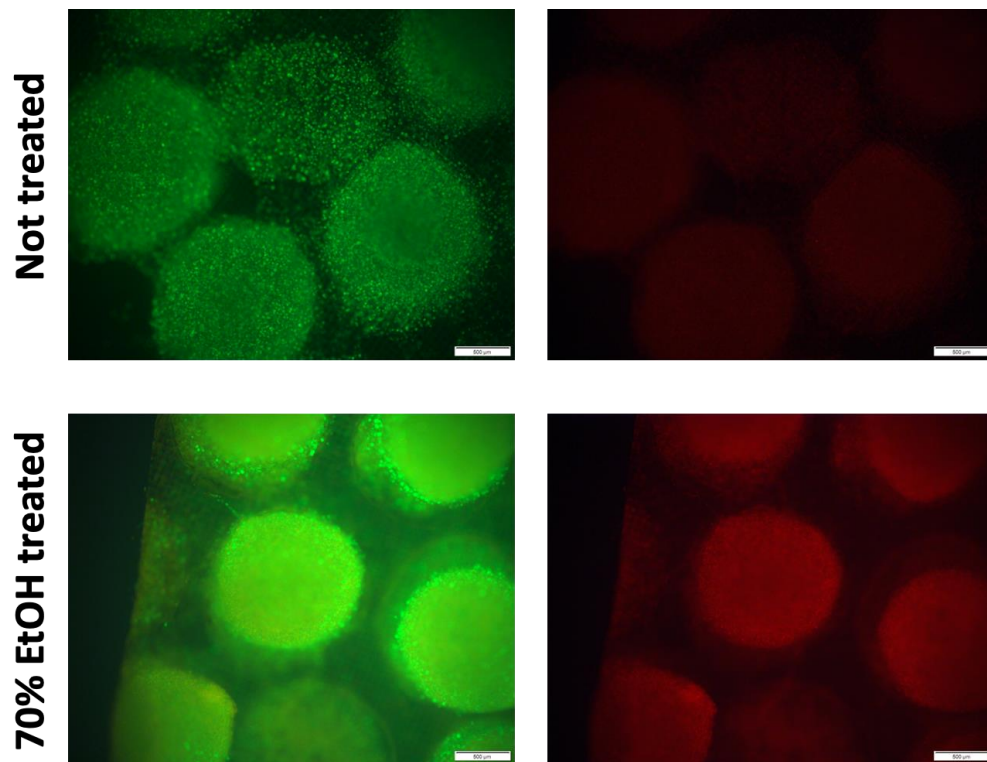

**Figure S1.** Dead cell control for Live/Dead viability characterization. Dead cell control tissues were first incubated for 30 minutes in 70% methanol, and then submerged in 2  $\mu$ M calcein AM and 4  $\mu$ M of ethidium homodimer-1 in PBS and incubated in the dark at room temperature for 45 minutes. Red indicates dead cells. Scale bars = 500  $\mu$ m.

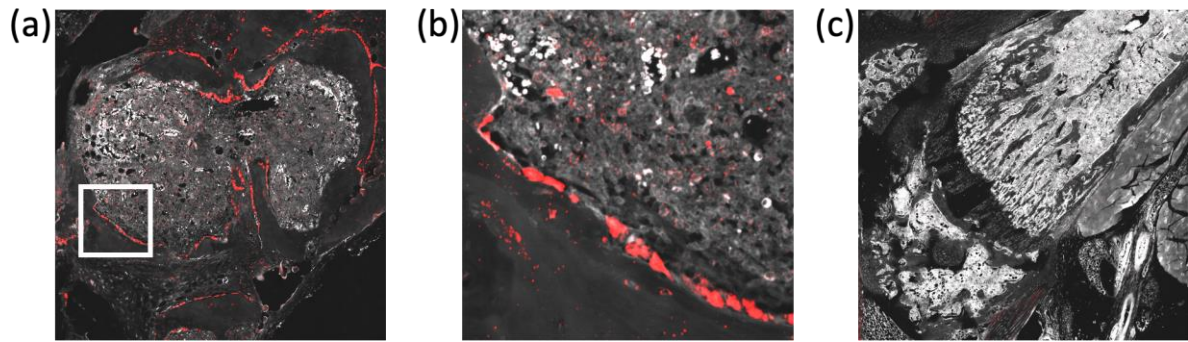

**Figure S2.** Human GAPDH (hGAPDH) staining in tissue with RNAscope (red). **(a)** hGAPDH staining in week 16 micro-ossicles transplanted with human CD34<sup>+</sup> cells. hGAPDH-stained cells in the marrow and in the bone tissue. **(b)** Zoomed-in image of white box area from (a). **(c)** Cross section of mouse femur at synovial joint, not transplanted with human CD34<sup>+</sup> cells. No hGAPDH-stained cells. White is cell/tissue autofluorescence.

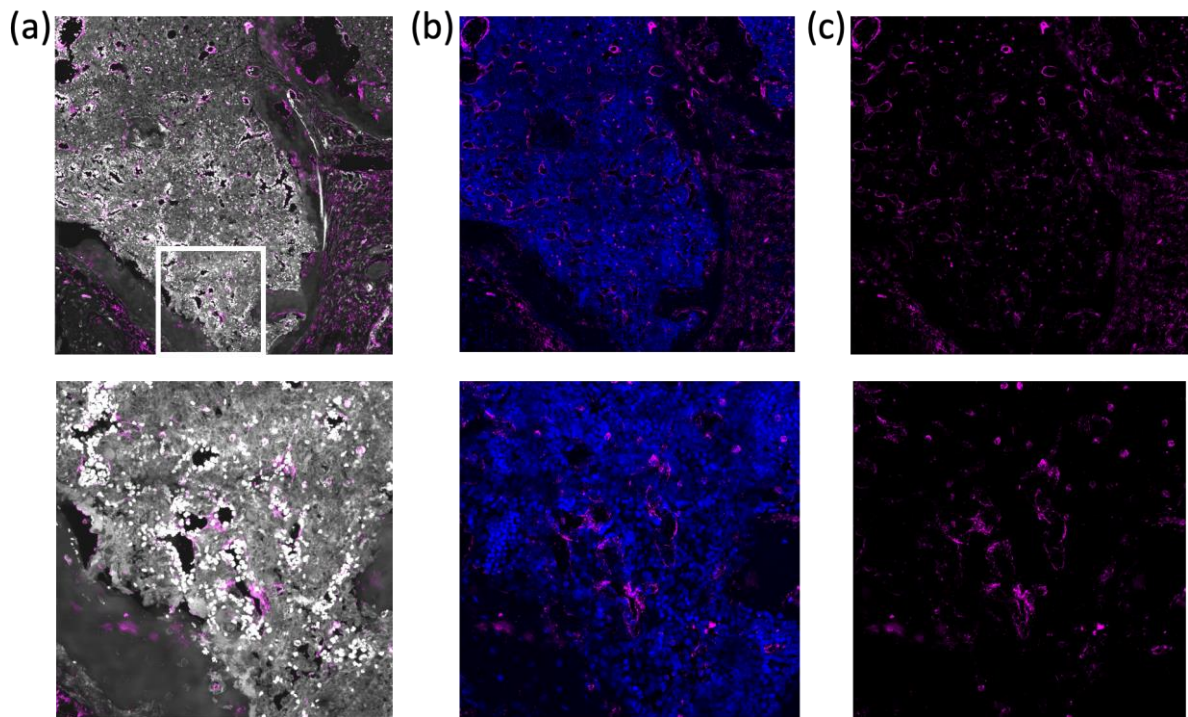

**Figure S3.** Micro-ossicles stained with rat anti-mouse CD13 and rat anti-mouse Endomucin). **(a)** Tissue autofluorescence (white) and anti-CD31/anti-Endomucin (magenta) localized to vascular structured and fibrous tissue, **(b)** without autofluorescence, but with DAPI (blue) and **(c)** anti-CD31/anti-Endomucin (magenta) channel only. Upper panel is 40x images stitched/tiled images, and lower panel is zoomed in on white box area from upper panel. Note that very bright [white] cells are autofluorescent red blood cells.

**(a) Bone marrow - Lineage cells**

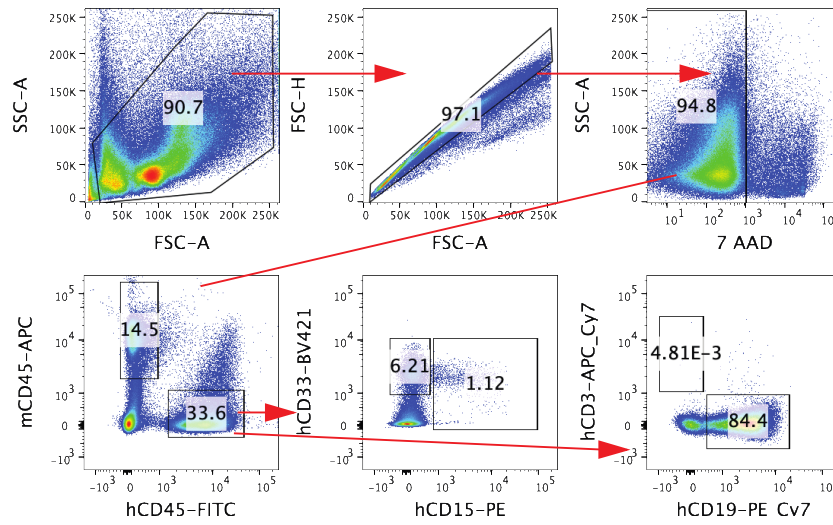

**(b) Bone marrow - Progenitors**

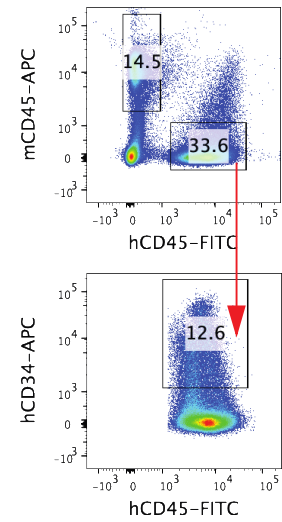

**(c) Peripheral Blood - Lineage cells**

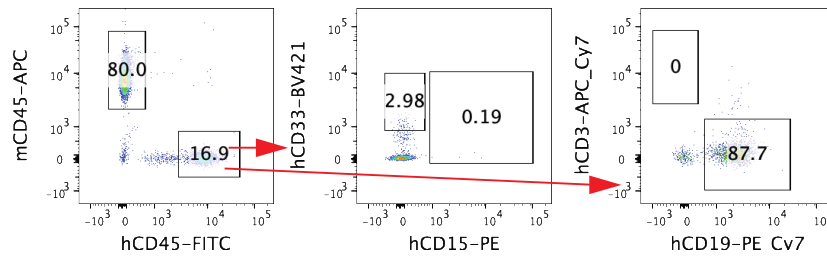

**Figure S4.** Gating strategy for flow cytometry analysis of human hematopoietic cells in mouse bone marrow, micro-ossicles and in peripheral blood. **(a)** bone marrow lineage cells, **(b)** bone marrow progenitor cells, and **(c)** peripheral blood lineage cells.
